# Supplementary material for: Temperature sensitivity and enzymatic mechanisms of soil organic matter decomposition along an altitudinal gradient on Mount Kilimanjaro
Source: PubMed Central journal article supplement (PMC4770592; doi:10.1038/srep22240), 2016-02-29
Supplement: srep22240-s1.pdf [file srep22240-s1.pdf]

## **Supplementary material**

**Type of contribution: Article**

**Temperature sensitivity and enzymatic mechanisms of soil organic matter decomposition along an altitudinal gradient on Mount Kilimanjaro**

**Authors:**

Evgenia Blagodatskaya<sup>1,2,6\*</sup>, Sergey Blagodatsky<sup>2,3</sup>, Nikita Khomyakov<sup>4</sup>, Olga Myachina<sup>5</sup>, Yakov Kuzyakov<sup>1,6</sup>

<sup>1</sup> Dept. of Soil Science of Temperate Ecosystems, University of Göttingen, 37077 Göttingen, Germany

<sup>2</sup> Institute of Physicochemical and Biological Problems in Soil Science, Russian Academy of Sciences, 142290 Pushchino, Russia

<sup>3</sup> Institute of Plant Production and Agroecology in the Tropics and Subtropics, University of Hohenheim, 70593 Stuttgart, Germany

<sup>4</sup> Forensic Science Centre of the Ministry of Internal Affairs of the Russian Federation, 125130 Moscow Russia

<sup>5</sup> Institute of General and Inorganic Chemistry, 100170 Tashkent, Uzbekistan

<sup>6</sup> Department of Agricultural Soil Science, University of Göttingen, 37077 Göttingen, Germany

**Corresponding author:** Evgenia Blagodatskaya

**phone:** +495513920509

**Email:** janeblag@mail.ru

**Correspondence address:**

Dept. of Soil Science of Temperate Ecosystems, University of Göttingen, 37077 Göttingen, Germany

**Supplementary table S1.** Characteristics of sampling sites and soils from altitudinal transect on Mt. Kilimanjaro, MAT – mean annual temperature.

| Altitude, m a.s.l. | Altitudinal zone      | Vegetation type                                 | C <sub>org</sub> | N    | C/N  | pH  | MAT °C |
|--------------------|-----------------------|-------------------------------------------------|------------------|------|------|-----|--------|
|                    |                       |                                                 | %                | %    |      |     |        |
| 950                | colline zone          | low mountain tropical forest                    | 12.8             | 0.9  | 14.2 | 4.5 | 22     |
| 2010               | middle mountane zone  | <i>Ocotea-Podocarpus</i> forest                 | 15.2             | 0.87 | 17.5 | 4.0 | 17.5   |
| 2435               | upper mountane zone   | <i>Podocarpus</i> forest                        | 10.7             | 0.62 | 17.3 | 4.5 | 12.5   |
| 2780               | lower subalpine zone  | <i>Erica excelsa</i> / <i>Podocarpus</i> forest | 20.9             | 1.2  | 17.4 | 3.7 | 8.5    |
| 3020               | middle subalpine zone | <i>Erica excelsa</i> / <i>Erica</i> shrubland   | 11.6             | 0.7  | 16.6 | 4.3 | 7.2    |

**Supplement 2.** Derivation of  $Q_{10\text{total}}$  and  $S_{\text{crit}}$ .

Both  $V_{\text{max}}$  and  $K_m$  are responsible for the reaction rate ( $v$ ) in Michaelis–Menten kinetics. As  $V_{\text{max}}$  increases with increasing temperature, the reaction rate can potentially increase, but as  $K_m$  also increases with increasing temperature, the affinity for the substrate decreases, so the reaction is slowed.

If a canceling effect occurs, the temperature increase does not cause the reaction rate to increase.

Let the 10 °C shift in temperature cause  $Q_{10}^{V_{\text{max}}}$ -fold increase in  $V_{\text{max}}$  and  $Q_{10}^{K_m}$ -fold increase in  $K_m$ . Then the reaction rates at 10 °C:  $v^{10\text{°C}} = V_{\text{max}} * S / (K_m + S)$

and at 20 °C:  $v^{20\text{°C}} = Q_{10}^{V_{\text{max}}} * V_{\text{max}} * S / (Q_{10}^{K_m} * K_m + S)$

Accordingly, the  $Q_{10}$  of reaction rate ( $Q_{10}^{\text{total}}$ ) is derived as:

$$Q_{10}^{\text{total}} = v^{20\text{°C}} / v^{10\text{°C}} = Q_{10}^{V_{\text{max}}} * V_{\text{max}} * S * (K_m + S) / (Q_{10}^{K_m} * K_m + S) * V_{\text{max}} * S,$$

$$\text{Finally, } Q_{10}^{\text{total}} = (Q_{10}^{V_{\text{max}}} * (K_m + S)) / (Q_{10}^{K_m} * K_m + S) \quad (1S)$$

Canceling means:  $v^{10\text{°C}} = v^{20\text{°C}}$ , i.e.

$$V_{\text{max}} * S / (K_m + S) = Q_{10}^{V_{\text{max}}} * V_{\text{max}} * S / (Q_{10}^{K_m} * K_m + S) \quad (2S)$$

We transformed Eq. 1S to analyze how high the  $Q_{10}^{K_m}$  (i.e. the  $K_m$  increase) should be to counterbalance a  $V_{max}$  increase by the factor of  $Q_{10}^{V_{max}}$ :

$$Q_{10}^{K_m} = (Q_{10}^{V_{max}} K_m) / K_m + (Q_{10}^{V_{max}} - 1) * S / K_m, \text{ or}$$

$$Q_{10}^{K_m} = Q_{10}^{V_{max}} + (Q_{10}^{V_{max}} - 1) * S / K_m. \quad (3S)$$

The substrate concentration in Equation 2S equals the critical substrate concentration ( $S_{crit}$ ) below which the canceling effect occurs. Theoretically, three situations can occur as a response of Michaelis-Menten parameters to temperature increase:

- 1) both  $K_m$  and  $V_{max}$  increase equally:  $S_{crit} = (Q_{10}^{K_m} - Q_{10}^{V_{max}}) * K_m / (Q_{10}^{V_{max}} - 1)$ . If  $Q_{10}^{K_m} = Q_{10}^{V_{max}}$ , canceling effect can occur only at zero substrate concentrations;
- 2)  $K_m$  increase is weaker than  $V_{max}$ :  $Q_{10}^{K_m} < Q_{10}^{V_{max}}$ . Canceling effect can occur only if  $Q_{10}^{V_{max}} < 1$ , i.e. both  $V_{max}$  and  $K_m$  decrease with temperature increase;
- 3)  $K_m$  increase is greater than  $V_{max}$ :  $Q_{10}^{K_m} > Q_{10}^{V_{max}}$ . Canceling effect can occur at  $S_{crit} = [(Q_{10}^{K_m} - Q_{10}^{V_{max}}) / (Q_{10}^{V_{max}} - 1)] * K_m$

Theoretically it is possible **that a temperature increase even results in slower reaction rates** for enzyme kinetics at low substrate concentrations:

$$v^{20oC} / v^{10oC} = Q_{10}^{V_{max}} (K_m + S) / (Q_{10}^{K_m} K + S) < 1,$$

$$S < [(Q_{10}^{K_m} - Q_{10}^{V_{max}}) / (Q_{10}^{V_{max}} - 1)] * K_m$$

This relationship is valid only for greater temperature sensitivity of  $K_m$  versus  $V_{max}$ . ( $Q_{10}^{K_m} > Q_{10}^{V_{max}}$ ).

At  $S > [(Q_{10}^{K_m} - Q_{10}^{V_{max}}) / (Q_{10}^{V_{max}} - 1)] * K_m$  the positive temperature response, i.e. increase in mineralization rates with the temperature can be predicted based on Michaelis–Menten kinetics.

**Supplementary table S3.** Substrate amounts below which a canceling effect occurs calculated by Eq.2 for the activity of hydrolytic enzymes in soils from 2010 and 3020 m a.s.l. on Mt. Kilimanjaro

| Altitude | $S_{crit}$                        |           |             |
|----------|-----------------------------------|-----------|-------------|
|          | Substrate, $\mu\text{mol g}^{-1}$ |           |             |
|          | Glucosidase                       | Chitinase | Phosphatase |
| 2010 m   | 1.68                              | 2.15      | 0.46        |
| 3020 m   | 2.39                              | 2.90      | 5.71        |

**Supplementary table S4.** Temperature-induced changes in substrate-to-enzyme affinity ( $K_m$ ), in maximal rate ( $V_{max}$ ) and activation energy ( $E_a$ ) of glucose oxidation in soils from an altitudinal transect on Mt. Kilimanjaro. The data marked by same letters (case-specific) are not significantly different.

| Altitude,<br>ma.s.l. | $K_m, \mu\text{g C g}^{-1}$ |                    | $V_{max}, \mu\text{g CO}_2\text{-C g}^{-1} \text{h}^{-1}$ |                    | $E_a, \text{kJ mol}^{-1}$ |
|----------------------|-----------------------------|--------------------|-----------------------------------------------------------|--------------------|---------------------------|
|                      | 10°C                        | 20°C               | 10°C                                                      | 20°C               |                           |
| 950                  | $6.38^d \pm 0.53$           | $20.80^c \pm 1.36$ | $2.13^J \pm 0.01$                                         | $9.30^D \pm 0.21$  | 100.4                     |
| 2010                 | $17.67^c \pm 2.18$          | $29.39^b \pm 1.48$ | $2.37^H \pm 0.09$                                         | $12.24^C \pm 0.21$ | 111.9                     |
| 2435                 | $17.49^c \pm 3.1$           | $34.05^a \pm 2.84$ | $2.18^{HJ} \pm 0.11$                                      | $5.49^F \pm 0.13$  | 62.9                      |
| 2780                 | $7.34^d \pm 1.64$           | $7.31^d \pm 0.49$  | $14.84^B \pm 1.39$                                        | $32.29^A \pm 2.24$ | 53.0                      |
| 3020                 | $3.12^e \pm 0.43$           | $3.13^e \pm 0.25$  | $3.02^G \pm 0.07$                                         | $7.98^E \pm 0.12$  | 66.1                      |

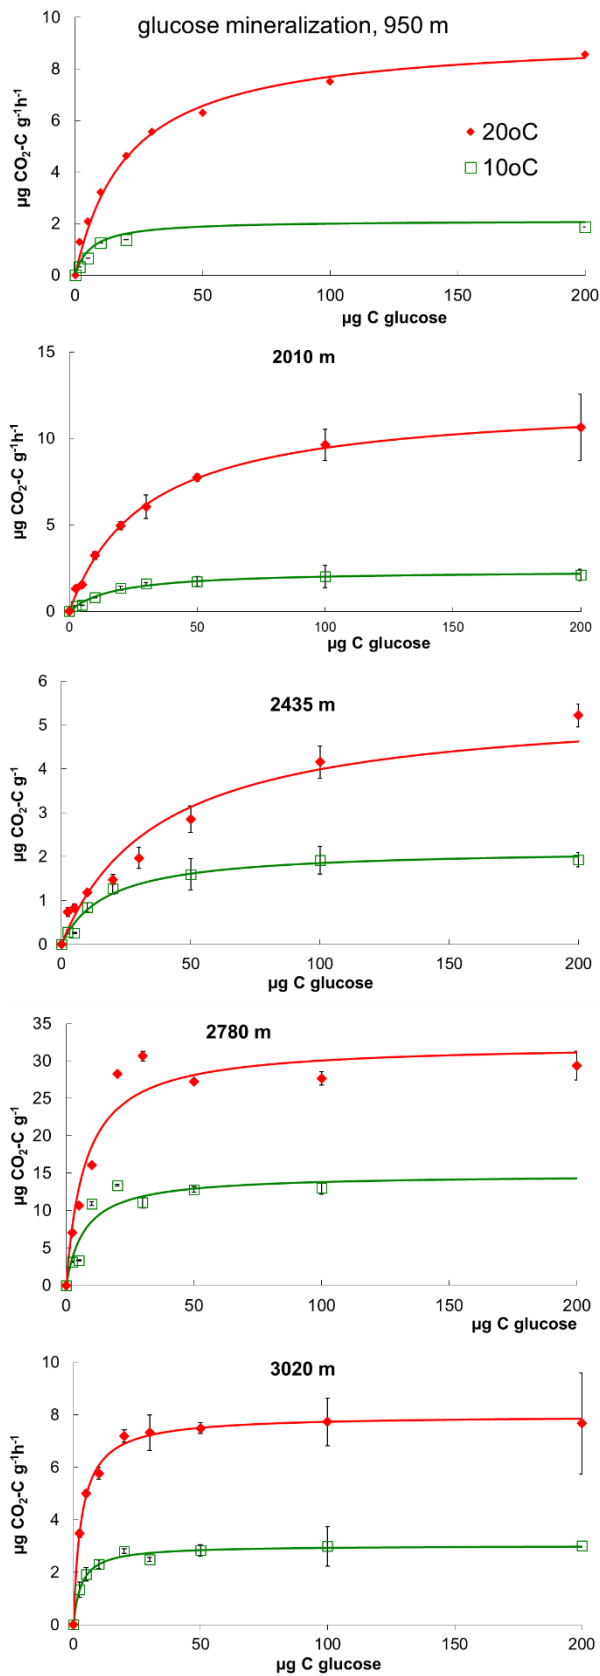

**Supplementary Figure S5.** Rate of  $\text{CO}_2\text{-C}$  production during glucose oxidation as dependent on substrate concentration at 10 and 20 °C for different altitudes. Symbols – experimental data, lines – approximation by Michaelis–Menten kinetics. Bars show standard deviations of the means ( $n=3$ ).
